# Supplementary material
Source: PubMed Central journal article supplement (PMC5988585)
Supplement: NIHMS966548-supplement-video_captions.pdf [file NIHMS966548-supplement-video_captions.pdf]

The following are the supplementary data related to this article:

---

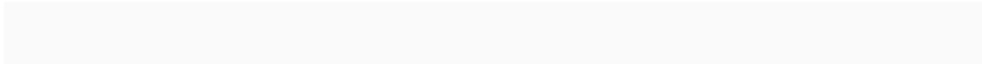

[Download video \(43MB\)](#)

[Help with mp4 files](#)

Supplemental Video 1. DCD fabrication process for tricuspid valve.1

---

---

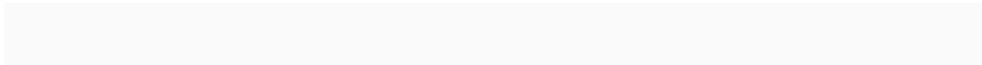

[Download video \(15MB\)](#)

[Help with mp4 files](#)

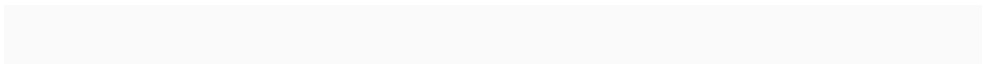

[Download video \(21MB\)](#)[Help with mp4 files](#)

Supplemental Video 2. **ex vivo valve leaflet coaptation test.** **a)** Native tricuspid valve and **b)** engineered tricuspid valve pressure and coaptation test with right ventricle pressure up to ~35 mmHg.2 3

---

---

  
[Download video \(1MB\)](#)[Help with mp4 files](#)  
[Download video \(3MB\)](#)[Help with mp4 files](#)

Supplemental Video 3. **in vitro valve dynamic comparison.** **a)** Carpentier-Edwards® Duraflex™ valve and **b)** engineered tricuspid valve dynamic test on pulse duplicator ([Fig. 10](#)) under physiological conditions (40% glycerol solution, VAD system set at 80 BPM and 30% ejection time, flow 4–5 L/min).4 5

---
